# Supplementary material for: Communication between Cyclin dependent kinase Cdc2 and the Wis1-Spc1 MAPK pathway determines mitotic timing in Schizosaccharomyces pombe
Source: Oxford University Press journal article supplement (doi:10.1242/bio.053322), 2020-01-01
Supplement: bio053322supp.pdf [file bio053322supp.pdf]

Supplementary Figure 1

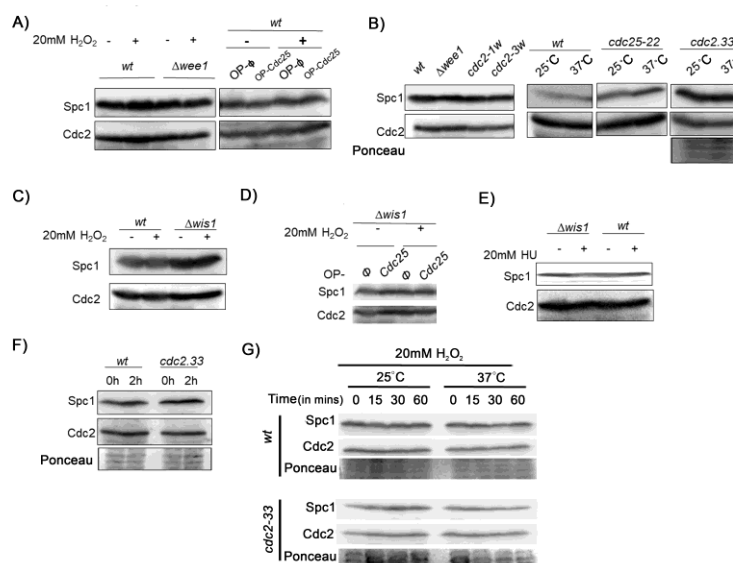

**Fig S1. Spc1 levels remain unchanged with variations in Cdc2 activity.** (A) Spc1 levels in *wt* and  $\Delta wee1$  cells treated with 20mM  $H_2O_2$  for 15 mins and in *wt* cells overexpressing pGS008( $\phi$ ) or pGS009(Cdc25-GFP) and treated with 20mM  $H_2O_2$  for 20 mins. Total Spc1 and Cdc2 protein levels in all cases determined by immunoblotting. (B) Spc1 levels in *wt*,  $\Delta wee1$ , *cdc2-1w*, *cdc2-3w* mutants and in *wt* and *cdc25-22*, *cdc2-33* at 25°C and 37°C (non-permissive temperature) (C) Spc1 levels in *wt* and  $\Delta wis1$  cells treated with 20mM  $H_2O_2$  for 15 mins. (D) Spc1 levels in *wt* and  $\Delta wis1$  cells overexpressing pGS008( $\phi$ ) or pGS009(Cdc25-GFP) and treated with 20mM  $H_2O_2$  for 20mins. (E) Spc1 levels in *wt* and  $\Delta wis1$  treated with 20mM HU for 15mins. (F) Spc1 levels in *cdc2-33 ts* mutant before (0 hr) and after release into permissive temperature (2 hrs) after being blocked at the non-permissive temperature. (G) Spc1 levels in *wt* and *cdc2-33 ts* mutant after treatment with 20mM  $H_2O_2$  for the indicated time points at the indicated temperatures. Spc1 and Cdc2 protein levels in all cases determined by immunoblotting. Cdc2 levels were used as the loading control except for *cdc2-33 ts* for which total protein levels were used instead. All data are representative of three independent experiments.

## Supplementary Figure 2

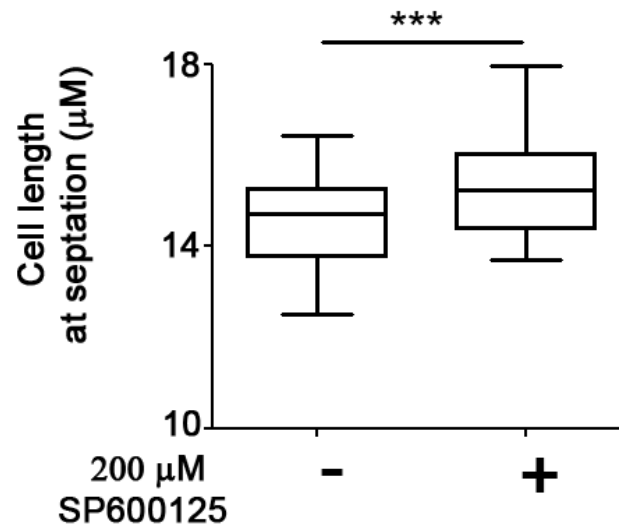

**Fig. S2.** Quantification of the length at septation of *wt S. pombe* cells before and after treatment with Spc1 inhibitor (SP600125) for 2 hr, using ImageJ software. \*\*\*  $p < 0.001$  ( $n > 100$ ). All data are representative of three independent experiments.
